# Supplementary material for: Hydrazine electrooxidation mediated by transition metal octaethylporphyrin-modified electrodes
Source: Royal Society of Chemistry journal article supplement (doi:10.1039/c5nj03084f), 2016-01-01
Supplement: c5nj03084f1.pdf [file c5nj03084f1.pdf]

## Hydrazine electrooxidation mediated by transition metal octaethylporphyrins-modified electrodes

---

Camila Canales, Leyla Gidi, Roxana Arce and Galo Ramírez

New Journal of Chemistry

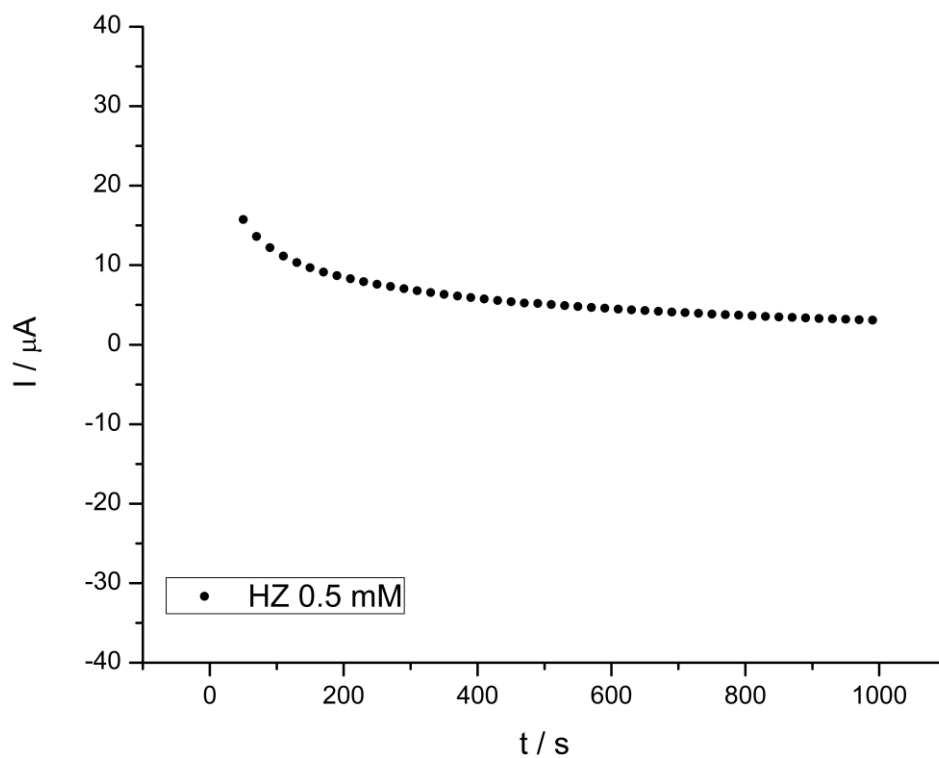

**Figure S1.** Chronoamperometric curve for GC-Co<sup>II</sup>OEP system at -0.4 V in a 0.5 mM of hydrazine in 0.066 M phosphate buffer solution, pH 7.0, purged in Ar. Total time of experiment: 1000 s.

**Table S1.** Comparison of limits of detection (LOD) found on different reported systems

| <b>System</b>                                                                     | <b>Limit of detection (LOD)</b>         |
|-----------------------------------------------------------------------------------|-----------------------------------------|
| GC - Co(II)OEP (this study)                                                       | $5.2 \times 10^{-5} \text{ mol L}^{-1}$ |
| Hexacyanoferrate-Decorated Titania Nanotube: CoHCF@TNT Modified GCE <sup>27</sup> | $1.0 \times 10^{-3} \text{ mol L}^{-1}$ |
| FePc-linked-MPyr-SAM-modified Au electrode <sup>28</sup>                          | $1.1 \times 10^{-5} \text{ mol L}^{-1}$ |
| Vitamin B-12 adsorbed onto GC electrode <sup>29</sup>                             | $1.0 \times 10^{-4} \text{ mol L}^{-1}$ |
